# Supplementary material for: Fabrication of hierarchical integrated 3D hollow MnS@MoS2 microcubes via a template-controlled synthesis for asymmetric supercapacitors
Source: Royal Society of Chemistry journal article supplement (doi:10.1039/d2ta00106c), 2022-01-01
Supplement: d2ta00106c1.pdf [file d2ta00106c1.pdf]

## Supporting Information

### **Hierarchical Integrated 3D Hollow MnS@MoS<sub>2</sub> Microcube via Template-Controlled Synthesis for Asymmetric Supercapacitors**

Qiannan Zhou,<sup>§ab</sup> Wei Li,<sup>§b</sup> Huizhong Xu,<sup>a</sup> Mengyou Gao,<sup>c</sup> Xiaochen Dong,<sup>d</sup> and Jianjian Lin<sup>\*a</sup>

<sup>a</sup> Shandong Key Laboratory of Biochemical Analysis, College of Chemistry and Molecular Engineering, Qingdao University of Science and Technology, Qingdao 266042, China.

<sup>b</sup> Engineering Research Center of High Performance Polymer and Molding Technology, Qingdao University of Science and Technology, Qingdao 266042, China.

<sup>c</sup> College of Automation and Electronic Engineering, Qingdao University of Science and Technology, Qingdao 266042, China.

<sup>d</sup> Key Laboratory of Flexible Electronics (KLOFE) & Institute of Advanced Materials (IAM), Nanjing Tech University (NanjingTech), 30 South Puzhu Road, Nanjing, 211800, China.

\*Corresponding author. E-mail: Jianjian\_Lin@qust.edu.cn

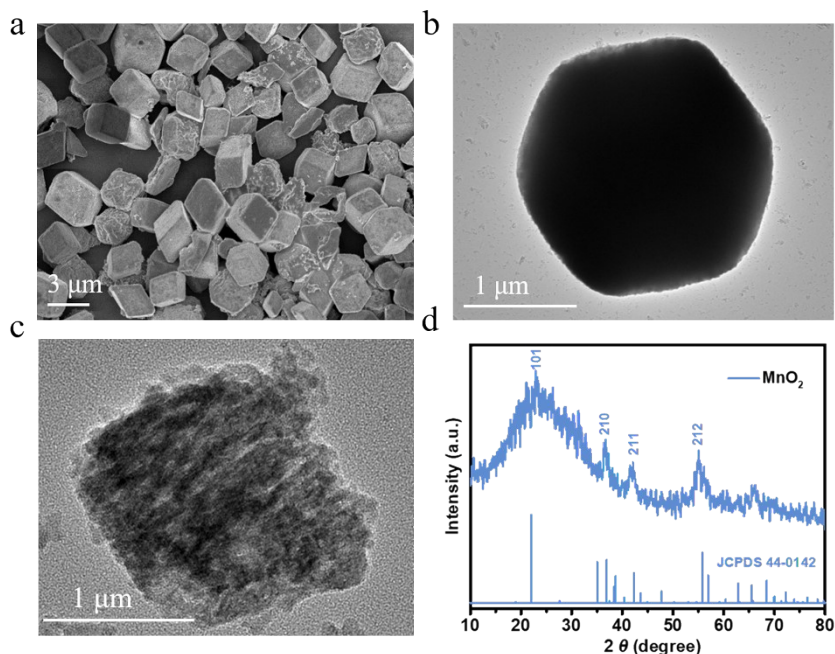

Figure S1. (a, b) SEM and TEM images of MnCO<sub>3</sub>. (c, d) TEM image and XRD pattern of hollow MnO<sub>2</sub>.

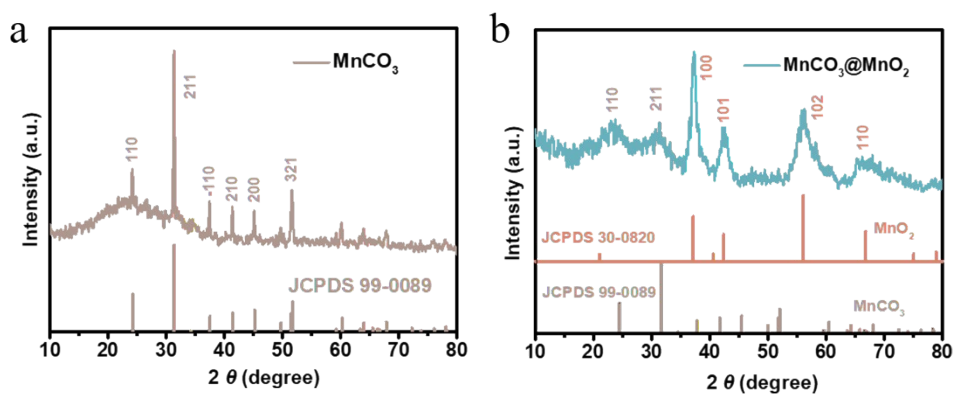

Figure S2. The XRD pattern of (a) MnCO<sub>3</sub> and (b) MnCO<sub>3</sub>@MnO<sub>2</sub>.

The peak at 23° and 33° in the XRD patterns (Figure S2b) are matched to the (110) and (211) crystal planes of MnCO<sub>3</sub> (JCPDS 99-0089), which confirmed the existence of intermediates. This XRD pattern (Figure S2) indicated the MnCO<sub>3</sub> transformed into the MnCO<sub>3</sub>@MnO<sub>2</sub> after the calcination and the as-synthesized composite was the basis of H<sup>+</sup> etching into hollow-cube through.

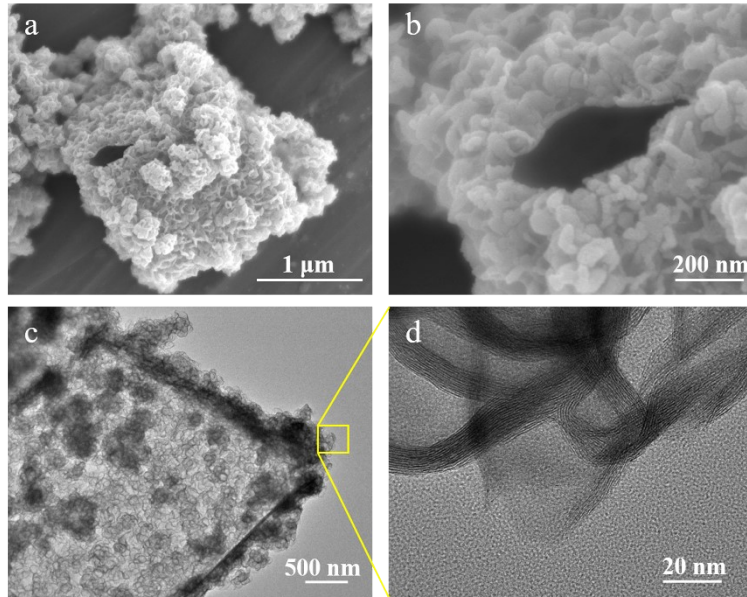

Figure S3. The SEM and TEM images of MnS@MoS<sub>2</sub>.

As shown in Figure 1d and Figure S3c, the TEM images of MnS@MoS<sub>2</sub> proved the existence of hollow structure. The hollow MnS microcube was wrapped by the MoS<sub>2</sub> nanosheets. Besides, the structural features of MoS<sub>2</sub> nanosheets can be seen from the enlarged TEM image of edges (Figure S3d).

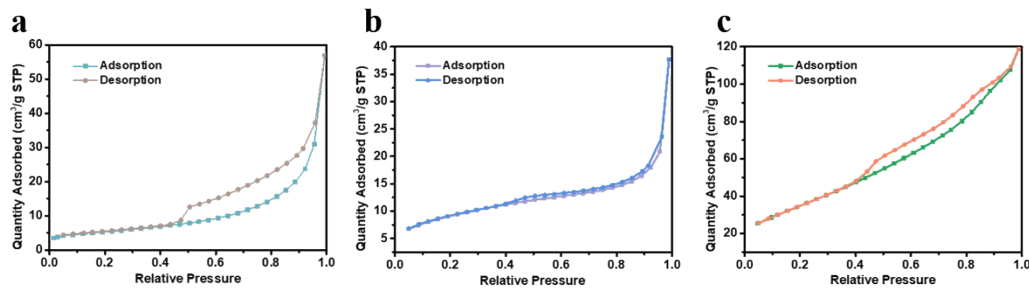

Figure S4. The N<sub>2</sub> ab-/desorption isotherm curves of (a) MnCO<sub>3</sub>, (b) MnO<sub>2</sub> and (c) MnS@MoS<sub>2</sub> composite.

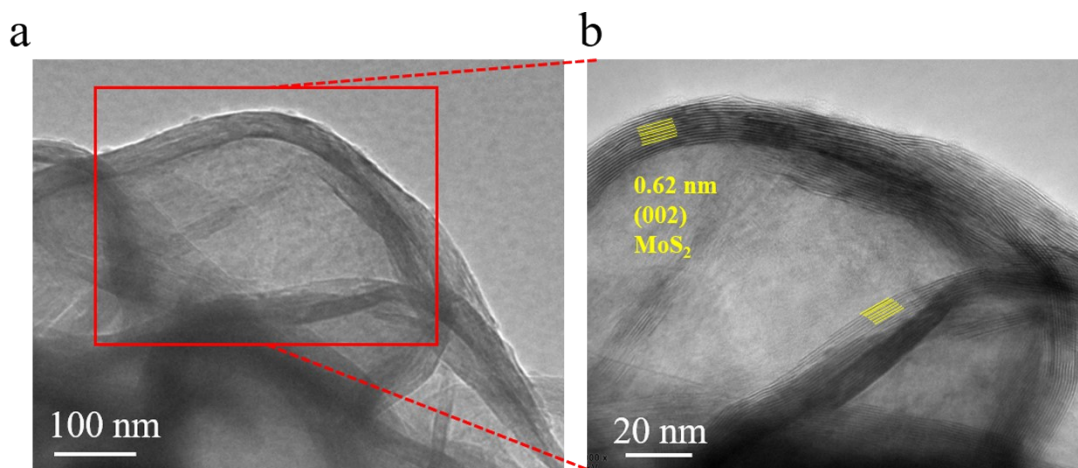

Figure S5. (a) TEM images of edge MoS<sub>2</sub>. (b) Enlarged TEM image of a.

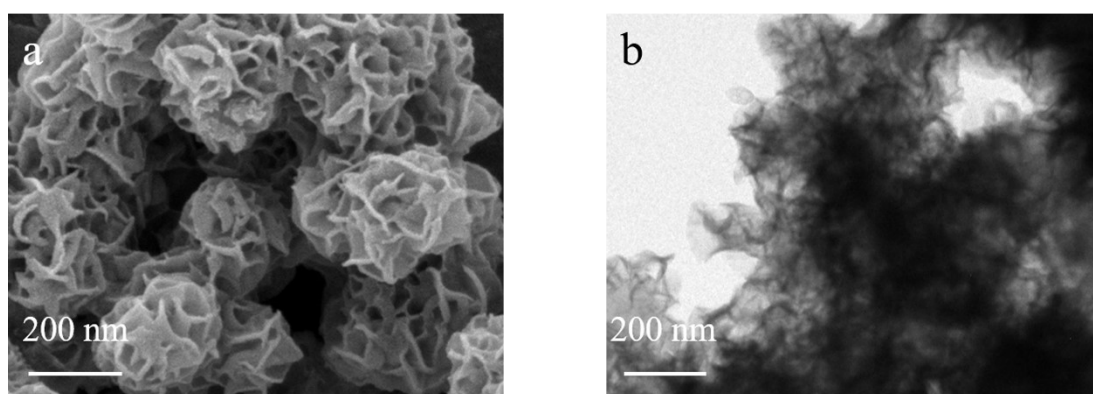

Figure S6. (a, b) SEM and TEM images of pure MoS<sub>2</sub>.

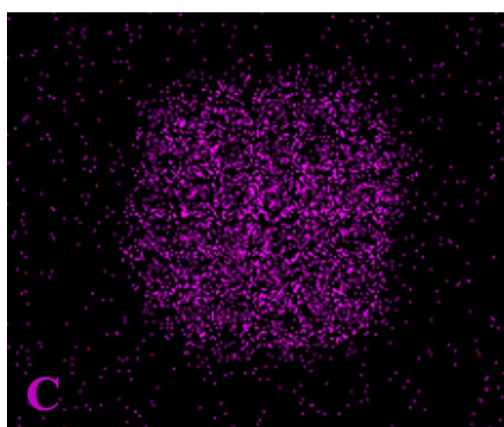

Figure S7. EDS mapping of C elements.

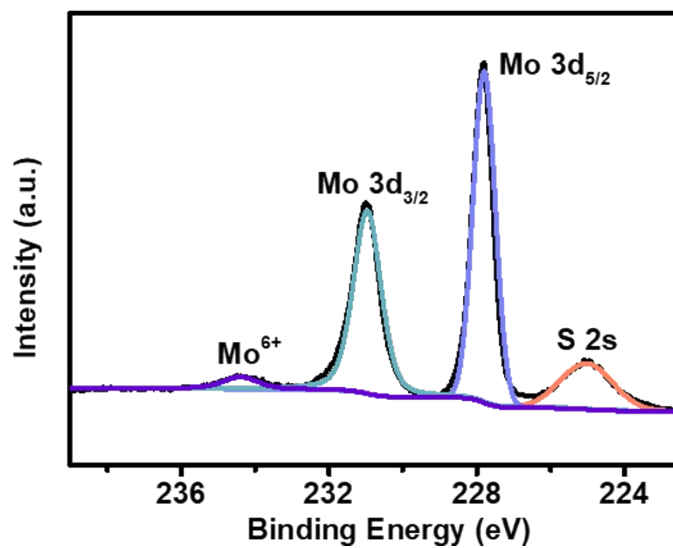

Figure S8. The high-resolution Mo XPS spectra of MoS<sub>2</sub>.

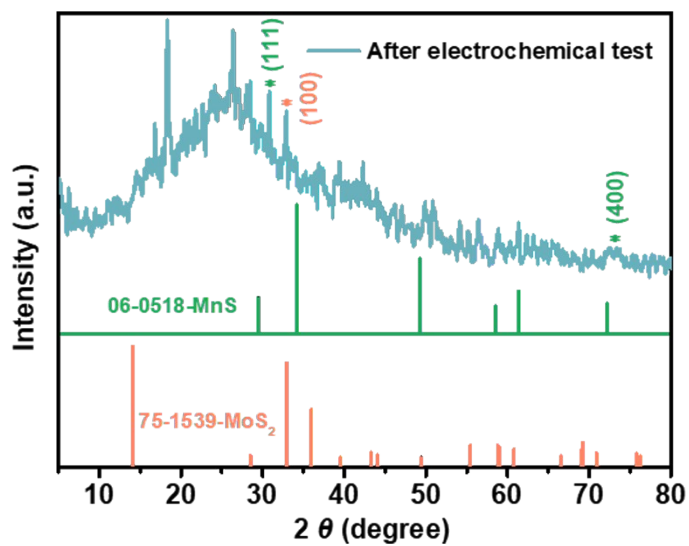

Figure S9. The XRD pattern of MnS@MoS<sub>2</sub> after electrochemical test.

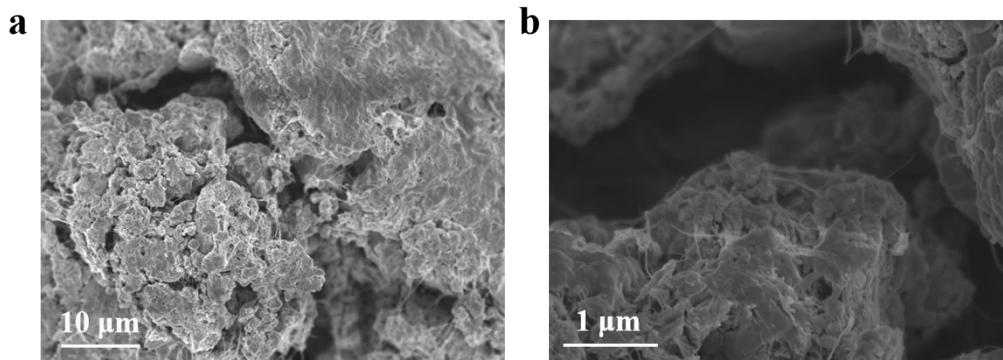

Figure S10. The SEM images of MnS@MoS<sub>2</sub> after electrochemical test.

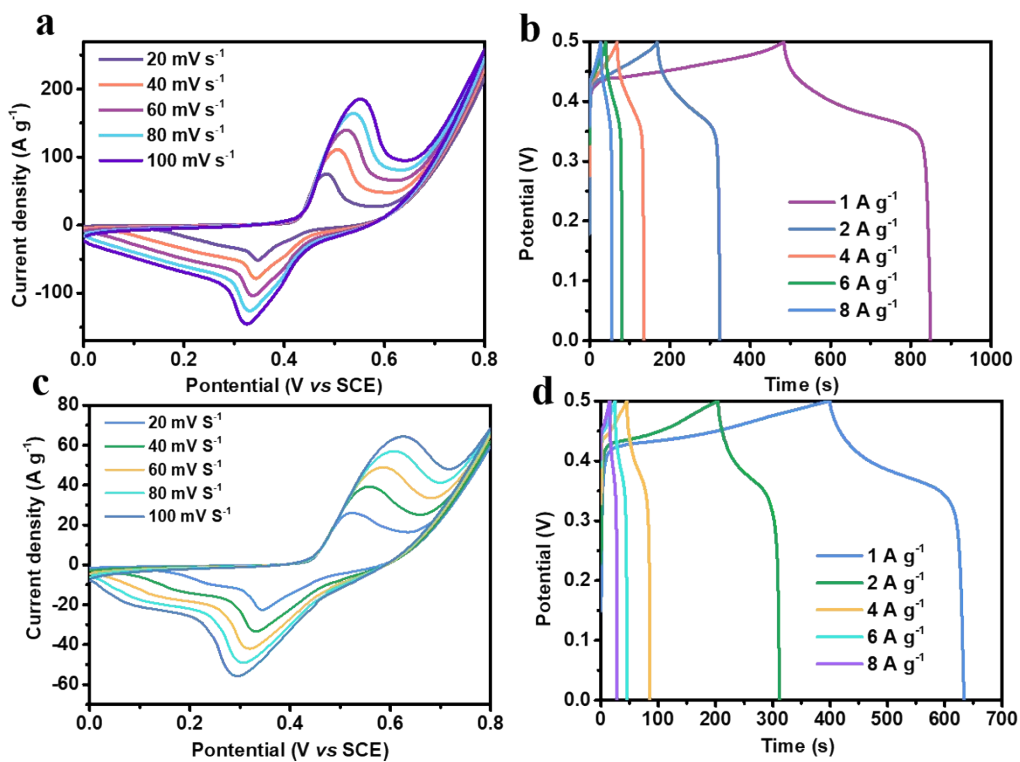

Figure S11. (a) CV curves of MoS<sub>2</sub> at various scan rates. (b) GCD curves of MoS<sub>2</sub> at various current densities. (c) CV curves of MnS at various scan rates. (d) GCD curves of MoS<sub>2</sub> at various current densities.

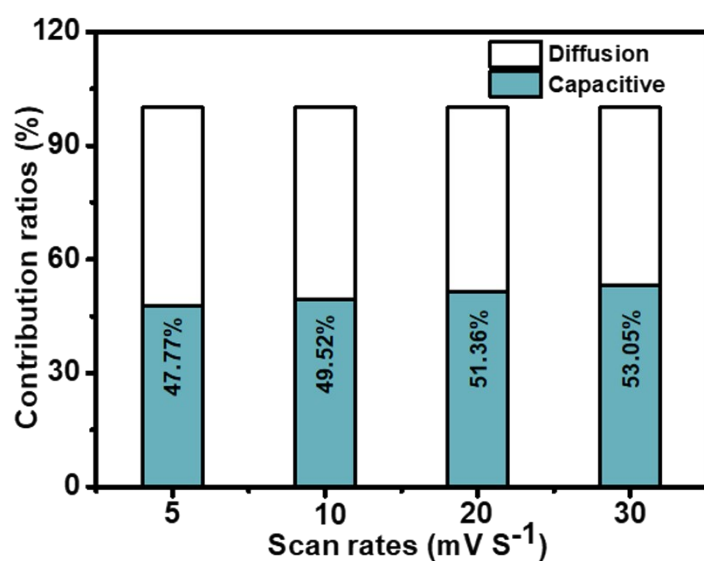

Figure S12. The capacitive contributions of MnS@MoS<sub>2</sub> at 5-30 mV s<sup>-1</sup>.

The contribution of different charge storage mechanism can be further characterized by the data at the scan rates of 5-30 mV s<sup>-1</sup>. The contribution of surface capacitive process increased with the scan rates increasing.

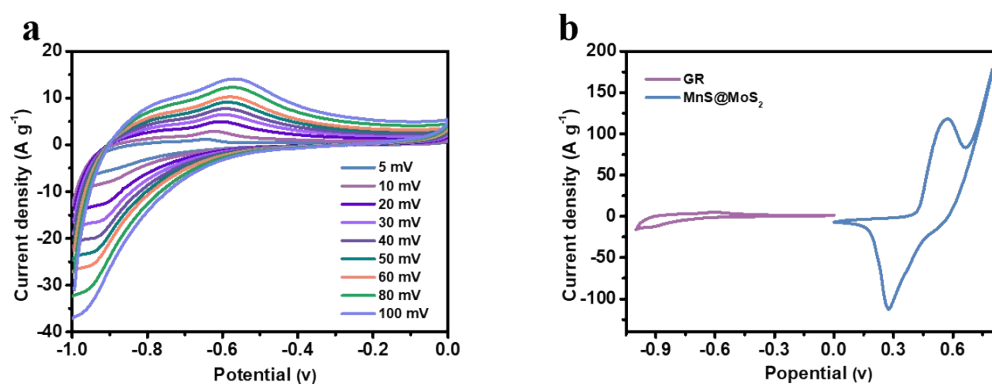

Figure S13. (a) CV curves of the GR at 5–100 mV s<sup>-1</sup>. (b) CV curves collected for GR and MnS@MoS<sub>2</sub> electrodes at a scan rate of 50 mV s<sup>-1</sup>.

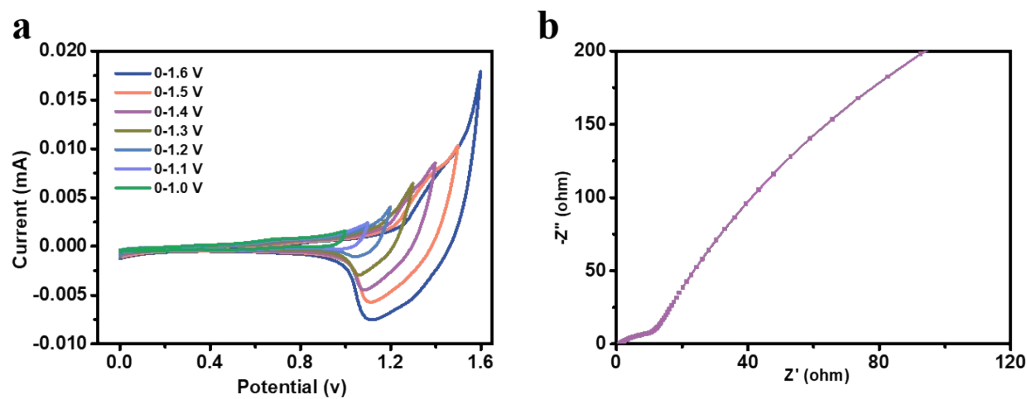

Figure S14. (a) CV curves of the MnS@MoS<sub>2</sub>//GR at various potential windows of 20 mV s<sup>-1</sup>. (b) EIS of Mn@MoS<sub>2</sub>//GR device.

Table S1 Comparison with previous reported asymmetric supercapacitors device

| Electrode material    | Energy density | Power density |
|-----------------------|----------------|---------------|
| Ni-Co-S@MnS           | 20.5           | 2000          |
| MnO <sub>2</sub> @ppy | 23             | 1800          |
| MnS microfiber        | 42.7           | 1200          |
| MnS nanocrystal       | 24.9           | 5946          |
| This work             | 65/29          | 1600/6400     |
